# Supplementary material
Source: PubMed Central journal article supplement (PMC7124904)
Supplement: tpmd190320.SD1.pdf [file tpmd190320.SD1.pdf]

**Supplementary Figure 1**

ROC curve for the sensitivity and 1-specificity of qSOFA for in-hospital mortality in patients with a suspected infection

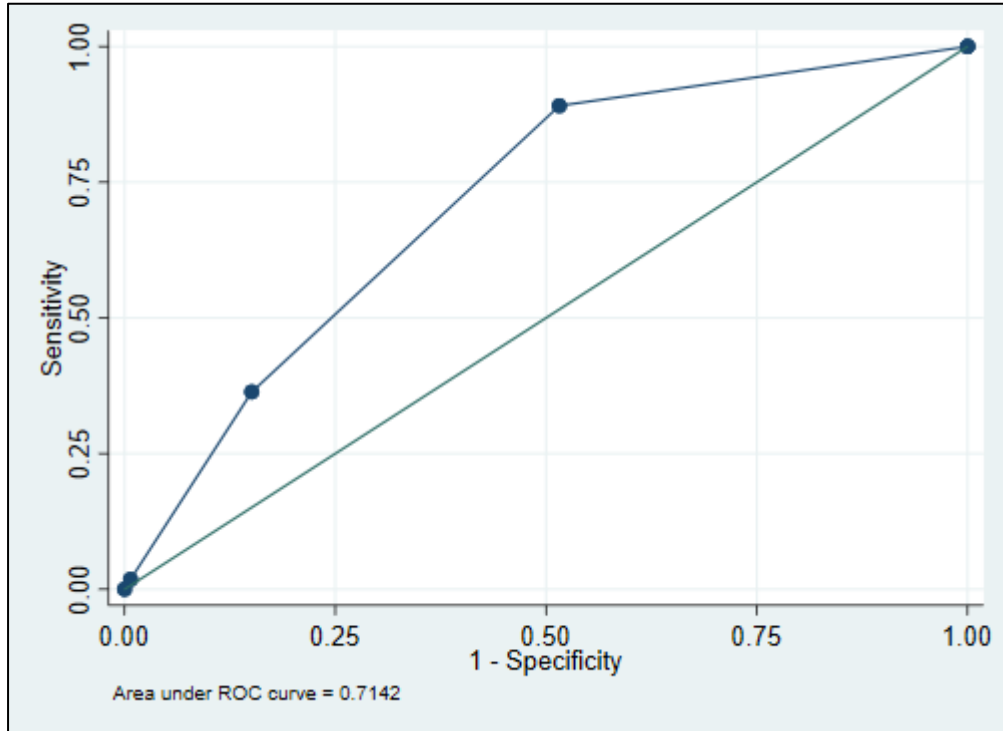

ROC Receiver Operating Characteristics
