# Supplementary material
Source: PubMed Central journal article supplement (PMC7124904)
Supplement: tpmd190320.SD2.pdf [file tpmd190320.SD2.pdf]

## Supplementary Figure 2

ROC curve for the sensitivity and 1-specificity of qSOFA for in-hospital mortality in all patients

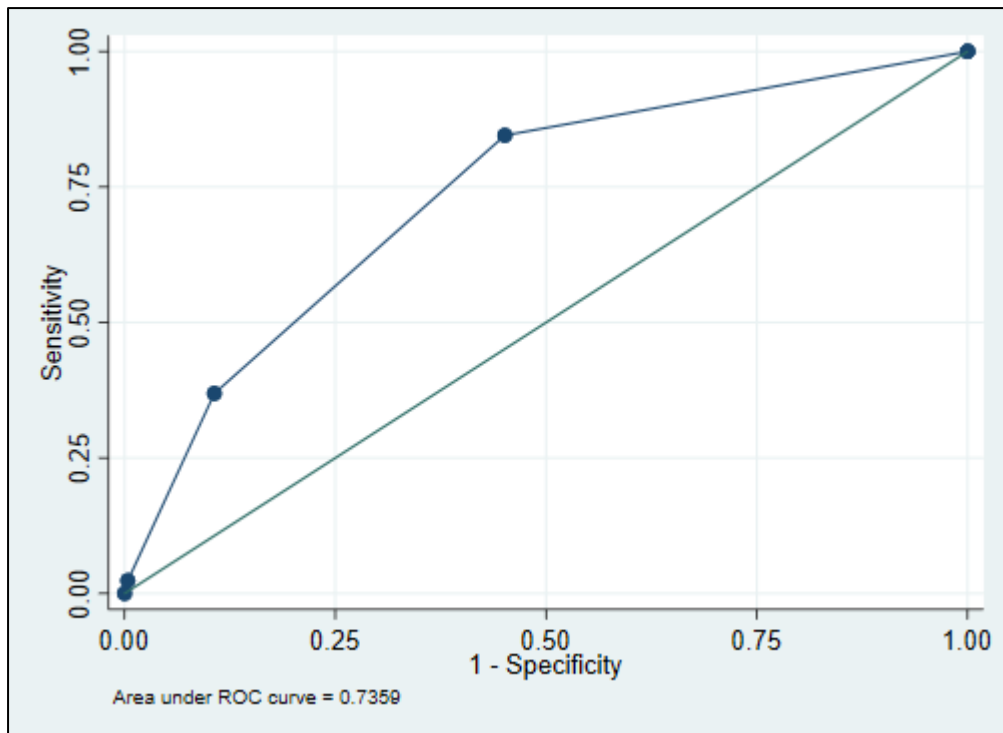

ROC Receiver Operating Characteristics
