# Supplementary material
Source: PubMed Central journal article supplement (PMC7124904)
Supplement: tpmd190320.SD3.pdf [file tpmd190320.SD3.pdf]

## Supplementary table 1

### Patient characteristics, sepsis prevalence and outcomes by hospital

|                                                                 | Chiradzulu District Hospital | Queen Elizabeth Central Hospital |
|-----------------------------------------------------------------|------------------------------|----------------------------------|
|                                                                 | N=243                        | N=892                            |
| Female n (%)                                                    | 167 (68.7)                   | 506 (56.7)                       |
| Age, mean years(SD)                                             | 39 (17.0)                    | 39 (16.4)                        |
| HIV positive*, n (%)                                            | 74/184 (40.2)                | 293/662 (44.3)                   |
| Specialty, n (%)                                                |                              |                                  |
| Medicine                                                        | 109 (44.9)                   | 364 (40.8)                       |
| Surgery                                                         | 57 (23.5)                    | 262 (29.4)                       |
| Obstetrics and Gynaecology                                      | 76 (31.3)                    | 216 (24.2)                       |
| Ophthalmology                                                   | 0 (0)                        | 20 (2.2)                         |
| Other                                                           | 1 (0.4)                      | 30 (3.4)                         |
| Length of hospital stay, median days (IQR)                      |                              |                                  |
| Before data collection                                          | 4 (2-12)                     | 5 (2-13)                         |
| After data collection                                           | 3 (1-6)                      | 5 (2-11)                         |
| Total Length of Stay                                            | 8 (4-17)                     | 12 (6-24)                        |
| Patients with suspected infection n(%)                          | 107 (44.0)                   | 312 (35.0)                       |
| Patients with qSOFA $\geq 2$ n(%)                               | 26 (10.7)                    | 116 (13.0)                       |
| Patients with sepsis n(%)**                                     | 16 (6.6)                     | 65 (7.3)                         |
| 48-hour mortality n/N (%)                                       | 5/242 (2.1)                  | 18/875 (2.1)                     |
| In hospital mortality n/N (%)                                   | 9/242 (3.7)                  | 75/875 (8.6)                     |
| In-hospital mortality of patients with suspected sepsis n/N (%) | 2/16 (12.5)                  | 12/64 (18.8)                     |

\*Proportion of positive/known HIV status

\*\*defined as suspected infection and qSOFA  $\geq 2$
