# Supplementary material
Source: PubMed Central journal article supplement (PMC7124904)
Supplement: tpmd190320.SD4.pdf [file tpmd190320.SD4.pdf]

## Supplementary table 2

### Missing Data

| <b>Variable</b>                           | <b>Number missing n (%)</b> |
|-------------------------------------------|-----------------------------|
| Sex                                       | 0 (0)                       |
| Age                                       | 10 (0.9)                    |
| HIV status                                | 289 (25.5)                  |
| Had surgery in hospital                   | 0 (0)                       |
| Specialty                                 | 0 (0)                       |
| Respiratory Rate                          | 15 (1.3)                    |
| Systolic Blood Pressure                   | 5 (0.4)                     |
| Conscious Level                           | 0 (0)                       |
| 48 Hour Outcome                           | 18 (1.6)                    |
| In-Hospital Outcome (censored at 30 days) | 18 (1.6)                    |
