# Supplementary material
Source: PubMed Central journal article supplement (PMC7124904)
Supplement: tpmd190320.SD5.pdf [file tpmd190320.SD5.pdf]

**Supplementary table 3****Alternative imputations for missing vital sign data**

|                       | Raw data     |            | Missing imputed as normal |            | Missing imputed as abnormal |             |
|-----------------------|--------------|------------|---------------------------|------------|-----------------------------|-------------|
|                       | N (%)        | Mortality  | N (%)                     | Mortality  | N (%)                       | Mortality   |
| qSOFA<2               | 995 (87.7% ) | 55 (5.6% ) | 1002 (88.3%)              | 56 (5.7%)  | 976 (87.4)                  | 53 ( 5.4%)  |
| qSOFA ≥2              | 140 (12.3% ) | 31 (22.3%) | 133 (11.7%)               | 30 (22.7%) | 142 (12.5%)                 | 31 ( 22.0%) |
| Respiratory rate>22   | 278(24.5%)   | 34 (12.5%) | 345 (30.4%)               | 40 (11.8%) | 360 (31.7%)                 | 40 (11.3%)  |
| Sbp <100              | 231(20.4%)   | 33 (14.4%) | 247 (21.8%)               | 33 (13.5%) | 252 (22.2%)                 | 34 ( 13.7%) |
| Altered mental status | 80(7.0%)     | 30 (37.5%) | 80                        | 30(37.5%)  | 83 (7.3%)                   | 30 ( 36.6%) |
