# Supplementary material
Source: PubMed Central journal article supplement (PMC7124904)
Supplement: tpmd190320.SD6.pdf [file tpmd190320.SD6.pdf]

## Supplementary Table 4

### Characteristics of the patients lost to follow-up

|                                          | Patients lost to follow up | Patients not lost to follow-up | p value |
|------------------------------------------|----------------------------|--------------------------------|---------|
| Total                                    | 18                         | 1117                           |         |
| Female n (%)                             | 13 (72.2%)                 | 660 (59.1%)                    | 0.260   |
| Age mean (SD)                            | 40 (18)                    | 39 (17)                        | 0.568   |
| HIV positive/HIV status known (%)        | 8/16 (50.0%)               | 359/830 (43.4%)                | 0.590   |
| Had surgery in hospital n (%)            | 3 (16.7%)                  | 262 (23.5%)                    | 0.499   |
| Specialty n (%)                          |                            |                                | 0.018   |
| Medicine                                 | 8 (44.4%)                  | 465 (41.6%)                    |         |
| Surgery                                  | 2 (11.1%)                  | 317 (28.4%)                    |         |
| Obstetrics & Gynaecology                 | 6 (33.3%)                  | 286 (25.6%)                    |         |
| Ophthalmology                            | 2 (11.1%)                  | 18 (1.6%)                      |         |
| Other                                    | 0                          | 31 (2.8%)                      |         |
| Length of hospital stay                  |                            |                                |         |
| Median (IQR) in days                     |                            |                                |         |
| Before data collection                   | 3 (1-7)                    | 5 (2-12)                       | 0.499   |
| After data collection <sup>1</sup> Total | 2 (2-2)                    | 4 (2-10)                       | 0.483   |
| Length of Stay                           | 9 (9-9)                    | 11 (5-22)                      | 0.833   |
| Infection diagnosis n (%)                | 6 (33.3%)                  | 413 (37.0%)                    | 0.751   |
| qSOFA score ≥2 n (%)                     | 1 (5.6%)                   | 141 (12.6%)                    | 0.369   |
| Sepsis* n (%)                            | 1 (5.6%)                   | 80 (7.2%)                      | 0.793   |

\* sepsis defined as infection diagnosis and qSOFA score ≥2

<sup>1</sup> censored at 30 days
